# Supplementary material for: Glaucoma is associated with plasmin proteolytic activation mediated through oxidative inactivation of neuroserpin
Source: PubMed Central journal article supplement (PMC5566433; doi:10.1038/s41598-017-08688-2), 2017-08-21
Supplement: 41598_2017_8688_MOESM1_ESM.pdf [file 41598_2017_8688_MOESM1_ESM.pdf]

**Glaucoma is associated with plasmin proteolytic activation mediated through oxidative  
inactivation of neuroserpin**

Vivek Gupta<sup>1\*</sup>, Mehdi Mirzaei<sup>2</sup>, Veer Bala Gupta<sup>3</sup>, Nitin Chitranshi<sup>1</sup>, Yogita Dheer<sup>1</sup>,  
Roshana VanderWall<sup>1</sup>, Mojdeh Abbasi<sup>1</sup>, Yuyi You<sup>4</sup>, Roger Chung<sup>1</sup>, Stuart Graham<sup>1,4</sup>

<sup>1</sup>Faculty of Medicine and Health Sciences, Macquarie University, Sydney, Australia.

<sup>2</sup>Department of Chemistry and Biomolecular Sciences, Macquarie University, Sydney,  
Australia.

<sup>3</sup>School of Medical Sciences, Edith Cowan University, Perth, Australia.

<sup>4</sup>Save Sight Institute, Sydney University, Sydney, Australia.

\*Corresponding author:

Faculty of Medicine and Health Sciences, 75, Talavera Road,

Macquarie University, Sydney, NSW 2109, Australia.

Tel.: +61 298502760.

E-mail address: vivek.gupta@mq.edu.au

## Legends to supplementary figures

**S1:** Microbeads were injected weekly into the rat eyes to induce increased IOP (2 months). Microbead injected eyes demonstrated a sustained increase in IOP compared to the control eyes (\* $p < 0.05$ ) as measured by I-care tonometer.

**S2:** Multiple alignment of human, mouse and rat neuroserpin amino acid sequence indicating that the protein primary structure is highly conserved (red) amongst the three species. Reactive site Arg-Met bond of the serpin is highlighted in the box (cyan).

**S3:** Western blot showing tissue plasminogen activator (tPA) expression in the **A.** human and **B.** rat retina. The relative intensities of bands in WB were quantified and plotted. Actin was used as internal loading control. ( $n=4$  each; \* $p < 0.05$ ). **C.** Time dependent tPA enzymatic assay was carried out (0-8 hrs) from human and rat retinal lysates from control and glaucoma samples ( $n=5$  each) and data plotted. Dotted lines represent allosteric sigmoidal curve regression analysis.

**S4:** Western blot showing tissue urokinase-type plasminogen activator (uPA) expression in the **A.** human and **B.** rat retina. The relative intensities of bands in WB were quantified and plotted. Actin was used as internal loading control ( $n=3$  each). **C.** Time dependent uPA enzymatic assay was carried out (0-8 hrs) from human and rat retinal lysates from control and glaucoma samples ( $n=5$  each, \* $p < 0.05$ ) and data plotted. Dotted lines represent allosteric sigmoidal curve regression analysis.

**S5:** Plasminogen peptides identified following neuroserpin immunoprecipitation and subjecting the trypsin digest of eluted proteins to mass spectrometric analysis.

**S6:** The relative intensities of bands in WB from WT and SOD mice (figure 9) were quantified and plotted. **A.** quantification of relative lane intensities (figure 9A) (\*p<0.05). **B.** quantification of relative band intensities (figure 9E) (\*p<0.05). **C.** quantification of relative band intensities (figure 9F) (\*p<0.05).

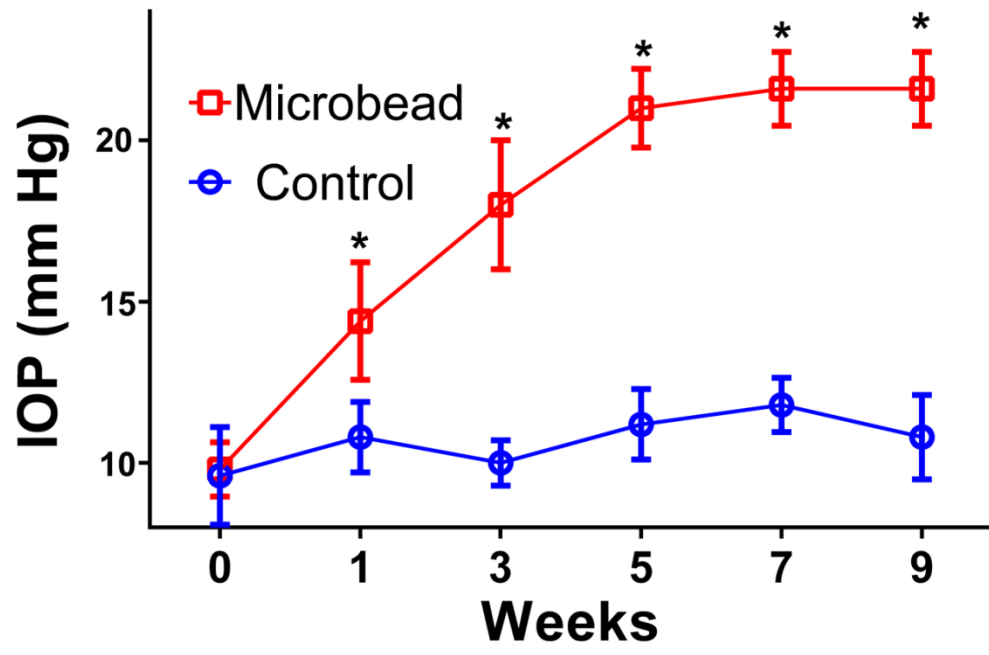

Fig. S1

|            |       |     |     |     |     |     |     |     |     |     |     |     |     |     |   |   |   |   |   |   |   |   |   |   |   |   |   |   |   |   |   |   |   |   |   |   |   |   |   |   |   |   |   |   |   |   |   |   |   |   |   |   |   |   |   |   |   |   |   |   |   |   |   |   |   |   |   |   |   |   |   |   |   |   |   |   |   |   |   |   |   |   |   |   |   |   |   |   |   |   |   |   |   |   |   |   |   |   |   |   |   |   |   |   |   |   |   |   |   |   |   |   |   |   |   |   |   |   |   |   |   |   |   |   |   |   |   |   |   |   |   |   |   |   |   |   |   |   |   |   |   |   |   |   |   |   |   |   |   |   |   |   |   |   |   |   |   |   |   |   |   |   |   |   |   |   |   |   |   |   |   |   |   |   |   |   |   |   |   |   |   |   |   |   |   |   |   |   |   |   |   |   |   |   |   |   |   |   |   |   |   |   |   |
|------------|-------|-----|-----|-----|-----|-----|-----|-----|-----|-----|-----|-----|-----|-----|---|---|---|---|---|---|---|---|---|---|---|---|---|---|---|---|---|---|---|---|---|---|---|---|---|---|---|---|---|---|---|---|---|---|---|---|---|---|---|---|---|---|---|---|---|---|---|---|---|---|---|---|---|---|---|---|---|---|---|---|---|---|---|---|---|---|---|---|---|---|---|---|---|---|---|---|---|---|---|---|---|---|---|---|---|---|---|---|---|---|---|---|---|---|---|---|---|---|---|---|---|---|---|---|---|---|---|---|---|---|---|---|---|---|---|---|---|---|---|---|---|---|---|---|---|---|---|---|---|---|---|---|---|---|---|---|---|---|---|---|---|---|---|---|---|---|---|---|---|---|---|---|---|---|---|---|---|---|---|---|---|---|---|---|---|---|---|---|---|---|---|---|---|---|---|---|---|---|---|---|---|---|---|---|---|---|---|---|---|
|            | 1     | 10  | 20  | 30  | 40  | 50  | 60  | 70  | 80  | 90  | 100 | 110 | 120 | 130 |   |   |   |   |   |   |   |   |   |   |   |   |   |   |   |   |   |   |   |   |   |   |   |   |   |   |   |   |   |   |   |   |   |   |   |   |   |   |   |   |   |   |   |   |   |   |   |   |   |   |   |   |   |   |   |   |   |   |   |   |   |   |   |   |   |   |   |   |   |   |   |   |   |   |   |   |   |   |   |   |   |   |   |   |   |   |   |   |   |   |   |   |   |   |   |   |   |   |   |   |   |   |   |   |   |   |   |   |   |   |   |   |   |   |   |   |   |   |   |   |   |   |   |   |   |   |   |   |   |   |   |   |   |   |   |   |   |   |   |   |   |   |   |   |   |   |   |   |   |   |   |   |   |   |   |   |   |   |   |   |   |   |   |   |   |   |   |   |   |   |   |   |   |   |   |   |   |   |   |   |   |   |   |   |   |   |   |   |   |
| NEUS_HUMAN | ----- |     |     |     |     |     |     |     |     |     |     |     |     |     |   |   |   |   |   |   |   |   |   |   |   |   |   |   |   |   |   |   |   |   |   |   |   |   |   |   |   |   |   |   |   |   |   |   |   |   |   |   |   |   |   |   |   |   |   |   |   |   |   |   |   |   |   |   |   |   |   |   |   |   |   |   |   |   |   |   |   |   |   |   |   |   |   |   |   |   |   |   |   |   |   |   |   |   |   |   |   |   |   |   |   |   |   |   |   |   |   |   |   |   |   |   |   |   |   |   |   |   |   |   |   |   |   |   |   |   |   |   |   |   |   |   |   |   |   |   |   |   |   |   |   |   |   |   |   |   |   |   |   |   |   |   |   |   |   |   |   |   |   |   |   |   |   |   |   |   |   |   |   |   |   |   |   |   |   |   |   |   |   |   |   |   |   |   |   |   |   |   |   |   |   |   |   |   |   |   |   |   |   |
| NEUS_MOUSE | M     | A   | F   | L   | G   | F   | S   | L   | L   | V   | L   | Q   | S   | M   | A | T | G | A | T | F | P | E | E | A | I | A | D | L | S | V | N | H | N | R | L | R | A | T | G | E | D | E | N | I | L | F | S | P | L | S | I | A | L | A | H | G | M | H | E | L | G | A | Q | G | S | T | R | K | E | I | R | H | S | H | G | Y | D | S | L | K | N | G | E | E | F | S | F | L | K | E | F | S | N | H | V | T | A | K | S | Q | Y | V | H | K | I | A | N | S | L | F | V | Q | N | G | F | H | V | N | E | E | F | L | Q | M | M | K |   |   |   |   |   |   |   |   |   |   |   |   |   |   |   |   |   |   |   |   |   |   |   |   |   |   |   |   |   |   |   |   |   |   |   |   |   |   |   |   |   |   |   |   |   |   |   |   |   |   |   |   |   |   |   |   |   |   |   |   |   |   |   |   |   |   |   |   |   |   |   |   |   |   |   |   |   |
| NEUS_RAT   | M     | A   | Y   | L   | G   | L   | L   | S   | L   | V   | A   | L   | Q   | S   | V | T | G | A | F | P | D | E | T | I | E | H | S | V | N | H | N | H | L | R | A | T | G | E | D | E | N | I | L | F | S | P | L | S | I | A | L | A | H | G | M | H | E | L | G | A | Q | G | S | T | L | K | E | I | R | H | S | H | G | Y | E | L | K | G | E | E | F | S | F | L | R | D | F | S | N | H | S | A | E | E | N | Q | Y | V | H | K | I | A | N | S | L | F | V | Q | N | G | F | H | V | N | E | E | F | L | Q | M | M | K |   |   |   |   |   |   |   |   |   |   |   |   |   |   |   |   |   |   |   |   |   |   |   |   |   |   |   |   |   |   |   |   |   |   |   |   |   |   |   |   |   |   |   |   |   |   |   |   |   |   |   |   |   |   |   |   |   |   |   |   |   |   |   |   |   |   |   |   |   |   |   |   |   |   |   |   |   |   |   |   |   |
| Consensus  | M     | a   | %   | L   | g   | L   | s   | L   | a   | l   | Q   | S   | .v  | T   | G | A | F | P | # | E | t | I | a | # | s | V | N | h | N | h | L | R | a | T | G | E | D | E | N | I | L | F | S | P | L | S | I | A | L | A | H | G | M | H | E | L | G | A | Q | G | S | T | _ | K | E | I | R | H | S | H | G | Y | # | s | L | . | G | E | E | F | S | F | L | r | # | F | S | N | H | s | A | e | E | . | Q | Y | V | H | K | I | A | N | S | L | F | V | Q | N | G | F | H | ! | N | E | E | F | L | Q | M | # | K |   |   |   |   |   |   |   |   |   |   |   |   |   |   |   |   |   |   |   |   |   |   |   |   |   |   |   |   |   |   |   |   |   |   |   |   |   |   |   |   |   |   |   |   |   |   |   |   |   |   |   |   |   |   |   |   |   |   |   |   |   |   |   |   |   |   |   |   |   |   |   |   |   |   |   |   |   |   |   |   |   |   |
|            | 131   | 140 | 150 | 160 | 170 | 180 | 190 | 200 | 210 | 220 | 230 | 240 | 250 | 260 |   |   |   |   |   |   |   |   |   |   |   |   |   |   |   |   |   |   |   |   |   |   |   |   |   |   |   |   |   |   |   |   |   |   |   |   |   |   |   |   |   |   |   |   |   |   |   |   |   |   |   |   |   |   |   |   |   |   |   |   |   |   |   |   |   |   |   |   |   |   |   |   |   |   |   |   |   |   |   |   |   |   |   |   |   |   |   |   |   |   |   |   |   |   |   |   |   |   |   |   |   |   |   |   |   |   |   |   |   |   |   |   |   |   |   |   |   |   |   |   |   |   |   |   |   |   |   |   |   |   |   |   |   |   |   |   |   |   |   |   |   |   |   |   |   |   |   |   |   |   |   |   |   |   |   |   |   |   |   |   |   |   |   |   |   |   |   |   |   |   |   |   |   |   |   |   |   |   |   |   |   |   |   |   |   |   |   |   |   |
| NEUS_HUMAN | ----- |     |     |     |     |     |     |     |     |     |     |     |     |     |   |   |   |   |   |   |   |   |   |   |   |   |   |   |   |   |   |   |   |   |   |   |   |   |   |   |   |   |   |   |   |   |   |   |   |   |   |   |   |   |   |   |   |   |   |   |   |   |   |   |   |   |   |   |   |   |   |   |   |   |   |   |   |   |   |   |   |   |   |   |   |   |   |   |   |   |   |   |   |   |   |   |   |   |   |   |   |   |   |   |   |   |   |   |   |   |   |   |   |   |   |   |   |   |   |   |   |   |   |   |   |   |   |   |   |   |   |   |   |   |   |   |   |   |   |   |   |   |   |   |   |   |   |   |   |   |   |   |   |   |   |   |   |   |   |   |   |   |   |   |   |   |   |   |   |   |   |   |   |   |   |   |   |   |   |   |   |   |   |   |   |   |   |   |   |   |   |   |   |   |   |   |   |   |   |   |   |   |   |
| NEUS_MOUSE | Y     | F   | N   | A   | E   | V   | N   | H   | V   | D   | F   | S   | Q   | N   | V | A | V | A | N | I | N | K | V | E | N | N | T | N | N | L | V | K | D | L | V | S | P | R | D | F | A | T | Y | L | A | L | I | N | A | V | Y | F | K | G | N | K | S | Q | F | R | P | E | N | T | R | T | F | S | F | T | K | D | D | E | S | E | V | Q | I | P | M | H | Y | Q | Q | G | E | F | Y | Y | G | E | F | S | D | G | S | N | E | A | G | G | I | Y | Q | V | L | E | I | P | Y | E | G | D | E | I | S | H | M | L | V | L | S | R | Q |   |   |   |   |   |   |   |   |   |   |   |   |   |   |   |   |   |   |   |   |   |   |   |   |   |   |   |   |   |   |   |   |   |   |   |   |   |   |   |   |   |   |   |   |   |   |   |   |   |   |   |   |   |   |   |   |   |   |   |   |   |   |   |   |   |   |   |   |   |   |   |   |   |   |   |   |   |   |
| NEUS_RAT   | Y     | F   | N   | A   | E   | V   | N   | H   | V   | D   | F   | S   | Q   | N   | V | A | V | A | N | I | N | K | V | E | N | Y | T | N | S | L | L | K | D | L | V | S | P | E | D | F | G | V | T | H | L | A | L | I | N | A | V | Y | F | K | G | N | K | S | Q | F | R | P | E | N | T | R | T | F | S | F | T | K | D | D | E | S | E | V | Q | I | P | M | H | Y | Q | Q | G | E | F | Y | Y | G | E | F | S | D | G | S | N | E | A | G | G | I | Y | Q | V | L | E | I | P | Y | E | G | D | E | I | S | H | M | L | V | L | S | R | Q |   |   |   |   |   |   |   |   |   |   |   |   |   |   |   |   |   |   |   |   |   |   |   |   |   |   |   |   |   |   |   |   |   |   |   |   |   |   |   |   |   |   |   |   |   |   |   |   |   |   |   |   |   |   |   |   |   |   |   |   |   |   |   |   |   |   |   |   |   |   |   |   |   |   |   |   |   |
| Consensus  | Y     | F   | N   | A   | e   | V   | N   | h   | V   | D   | F   | S   | #   | N   | V | A | v | a | n | i | n | k | v | e | n | y | t | n | s | l | k | d | l | v | s | p | . | d | f | g | v | t | . | l | . | a | l | . | i | n | . | a | v | . | y | . | f | . | k | . | g | . | n | . | k | . | s | . | q | . | f | . | r | . | p | . | e | . | n | . | t | . | r | . | t | . | f | . | s | . | f | . | t | . | k | . | d | . | d | . | e | . | s | . | e | . | v | . | q | . | i | . | p | . | m | . | h | . | y | . | q | . | q | . | g | . | e | . | f | . | y | . | y | . | g | . | e | . | f | . | s | . | d | . | g | . | s | . | n | . | e | . | a | . | g | . | g | . | i | . | y | . | q | . | v | . | l | . | e | . | i | . | p | . | y | . | e | . | g | . | d | . | e | . | i | . | s | . | h | . | m | . | l | . | v | . | l | . | s | . | r | . | q |
|            | 261   | 270 | 280 | 290 | 300 | 310 | 320 | 330 | 340 | 350 | 360 | 370 | 380 | 390 |   |   |   |   |   |   |   |   |   |   |   |   |   |   |   |   |   |   |   |   |   |   |   |   |   |   |   |   |   |   |   |   |   |   |   |   |   |   |   |   |   |   |   |   |   |   |   |   |   |   |   |   |   |   |   |   |   |   |   |   |   |   |   |   |   |   |   |   |   |   |   |   |   |   |   |   |   |   |   |   |   |   |   |   |   |   |   |   |   |   |   |   |   |   |   |   |   |   |   |   |   |   |   |   |   |   |   |   |   |   |   |   |   |   |   |   |   |   |   |   |   |   |   |   |   |   |   |   |   |   |   |   |   |   |   |   |   |   |   |   |   |   |   |   |   |   |   |   |   |   |   |   |   |   |   |   |   |   |   |   |   |   |   |   |   |   |   |   |   |   |   |   |   |   |   |   |   |   |   |   |   |   |   |   |   |   |   |   |   |
| NEUS_HUMAN | ----- |     |     |     |     |     |     |     |     |     |     |     |     |     |   |   |   |   |   |   |   |   |   |   |   |   |   |   |   |   |   |   |   |   |   |   |   |   |   |   |   |   |   |   |   |   |   |   |   |   |   |   |   |   |   |   |   |   |   |   |   |   |   |   |   |   |   |   |   |   |   |   |   |   |   |   |   |   |   |   |   |   |   |   |   |   |   |   |   |   |   |   |   |   |   |   |   |   |   |   |   |   |   |   |   |   |   |   |   |   |   |   |   |   |   |   |   |   |   |   |   |   |   |   |   |   |   |   |   |   |   |   |   |   |   |   |   |   |   |   |   |   |   |   |   |   |   |   |   |   |   |   |   |   |   |   |   |   |   |   |   |   |   |   |   |   |   |   |   |   |   |   |   |   |   |   |   |   |   |   |   |   |   |   |   |   |   |   |   |   |   |   |   |   |   |   |   |   |   |   |   |   |   |
| NEUS_MOUSE | E     | V   | P   | L   | A   | T   | L   | E   | P   | L   | K   | A   | Q   | L   | I | E | E | H | A | N | S | V | K | K | Q | K | V | E | Y | L | P | R | F | T | V | E | Q | E | I | D | L | K | D | V | L | K | A | L | G | T | E | I | F | I | K | D | A | N | L | T | G | L | S | N | K | E | I | F | L | S | K | A | I | H | K | S | F | L | E | V | N | E | E | G | S | E | A | A | V | S | G | H | I | A | I | S | R | H | A | V | L | P | Q | V | I | V | D | H | P | F | L | I | R | N | R | T | G | T | I | L | F |   |   |   |   |   |   |   |   |   |   |   |   |   |   |   |   |   |   |   |   |   |   |   |   |   |   |   |   |   |   |   |   |   |   |   |   |   |   |   |   |   |   |   |   |   |   |   |   |   |   |   |   |   |   |   |   |   |   |   |   |   |   |   |   |   |   |   |   |   |   |   |   |   |   |   |   |   |   |   |   |   |   |
| NEUS_RAT   | E     | V   | P   | L   | A   | T   | L   | E   | P   | L   | L   | K   | A   | Q   | L | I | E | E | H | A | N | S | V | K | K | Q | K | V | E | Y | L | P | R | F | T | V | E | Q | E | I | D | L | K | D | I | L | K | A | L | G | V | T | E | I | F | I | K | D | A | N | L | T | A | S | D | K | E | L | F | L | S | K | A | V | H | K | S | C | I | E | V | N | E | E | G | S | E | A | A | V | S | G | H | I | A | I | S | R | H | A | V | L | P | Q | V | I | V | D | H | P | L | I | R | N | R | K | S | G | I | L | F |   |   |   |   |   |   |   |   |   |   |   |   |   |   |   |   |   |   |   |   |   |   |   |   |   |   |   |   |   |   |   |   |   |   |   |   |   |   |   |   |   |   |   |   |   |   |   |   |   |   |   |   |   |   |   |   |   |   |   |   |   |   |   |   |   |   |   |   |   |   |   |   |   |   |   |   |   |   |   |   |   |   |
| Consensus  | E     | v   | p   | l   | a   | t   | l   | e   | p   | l   | k   | a   | q   | l   | ! | e | e | h | a | n | s | v | k | q | k | v | e | y | l | p | r | f | t | v | e | q | e | i | d | l | k | d | v | l | k | a | l | g | ! | t | e | i | f | i | k | d | a | n | l | t | g | s | d | k | e | l | f | l | s | k | a | ! | h | k | s | f | i | e | v | n | e | e | g | s | e | a | a | v | s | g | h | i | a | i | s | r | h | a | v | l | % | p | q | v | i | v | d | h | p | f | l | % | i | r | n | r | k | t | g | t | i | l | f |   |   |   |   |   |   |   |   |   |   |   |   |   |   |   |   |   |   |   |   |   |   |   |   |   |   |   |   |   |   |   |   |   |   |   |   |   |   |   |   |   |   |   |   |   |   |   |   |   |   |   |   |   |   |   |   |   |   |   |   |   |   |   |   |   |   |   |   |   |   |   |   |   |   |   |   |   |   |   |   |
|            | 391   | 400 | 410 |     |     |     |     |     |     |     |     |     |     |     |   |   |   |   |   |   |   |   |   |   |   |   |   |   |   |   |   |   |   |   |   |   |   |   |   |   |   |   |   |   |   |   |   |   |   |   |   |   |   |   |   |   |   |   |   |   |   |   |   |   |   |   |   |   |   |   |   |   |   |   |   |   |   |   |   |   |   |   |   |   |   |   |   |   |   |   |   |   |   |   |   |   |   |   |   |   |   |   |   |   |   |   |   |   |   |   |   |   |   |   |   |   |   |   |   |   |   |   |   |   |   |   |   |   |   |   |   |   |   |   |   |   |   |   |   |   |   |   |   |   |   |   |   |   |   |   |   |   |   |   |   |   |   |   |   |   |   |   |   |   |   |   |   |   |   |   |   |   |   |   |   |   |   |   |   |   |   |   |   |   |   |   |   |   |   |   |   |   |   |   |   |   |   |   |   |   |   |   |   |
| NEUS_HUMAN | ----- |     |     |     |     |     |     |     |     |     |     |     |     |     |   |   |   |   |   |   |   |   |   |   |   |   |   |   |   |   |   |   |   |   |   |   |   |   |   |   |   |   |   |   |   |   |   |   |   |   |   |   |   |   |   |   |   |   |   |   |   |   |   |   |   |   |   |   |   |   |   |   |   |   |   |   |   |   |   |   |   |   |   |   |   |   |   |   |   |   |   |   |   |   |   |   |   |   |   |   |   |   |   |   |   |   |   |   |   |   |   |   |   |   |   |   |   |   |   |   |   |   |   |   |   |   |   |   |   |   |   |   |   |   |   |   |   |   |   |   |   |   |   |   |   |   |   |   |   |   |   |   |   |   |   |   |   |   |   |   |   |   |   |   |   |   |   |   |   |   |   |   |   |   |   |   |   |   |   |   |   |   |   |   |   |   |   |   |   |   |   |   |   |   |   |   |   |   |   |   |   |   |   |
| NEUS_MOUSE | M     | G   | R   | V   | H   | P   | E   | T   | H   | N   | T   | S   | G   | H   | D | F | E | E | L |   |   |   |   |   |   |   |   |   |   |   |   |   |   |   |   |   |   |   |   |   |   |   |   |   |   |   |   |   |   |   |   |   |   |   |   |   |   |   |   |   |   |   |   |   |   |   |   |   |   |   |   |   |   |   |   |   |   |   |   |   |   |   |   |   |   |   |   |   |   |   |   |   |   |   |   |   |   |   |   |   |   |   |   |   |   |   |   |   |   |   |   |   |   |   |   |   |   |   |   |   |   |   |   |   |   |   |   |   |   |   |   |   |   |   |   |   |   |   |   |   |   |   |   |   |   |   |   |   |   |   |   |   |   |   |   |   |   |   |   |   |   |   |   |   |   |   |   |   |   |   |   |   |   |   |   |   |   |   |   |   |   |   |   |   |   |   |   |   |   |   |   |   |   |   |   |   |   |   |   |   |   |   |   |
| NEUS_RAT   | M     | G   | R   | V   | H   | P   | E   | T   | H   | N   | T   | S   | G   | H   | D | F | E | E | L |   |   |   |   |   |   |   |   |   |   |   |   |   |   |   |   |   |   |   |   |   |   |   |   |   |   |   |   |   |   |   |   |   |   |   |   |   |   |   |   |   |   |   |   |   |   |   |   |   |   |   |   |   |   |   |   |   |   |   |   |   |   |   |   |   |   |   |   |   |   |   |   |   |   |   |   |   |   |   |   |   |   |   |   |   |   |   |   |   |   |   |   |   |   |   |   |   |   |   |   |   |   |   |   |   |   |   |   |   |   |   |   |   |   |   |   |   |   |   |   |   |   |   |   |   |   |   |   |   |   |   |   |   |   |   |   |   |   |   |   |   |   |   |   |   |   |   |   |   |   |   |   |   |   |   |   |   |   |   |   |   |   |   |   |   |   |   |   |   |   |   |   |   |   |   |   |   |   |   |   |   |   |   |   |
| Consensus  | M     | G   | R   | V   | h   | p   | e   | t   | h   | n   | t   | s   | g   | h   | d | f | e | e | l |   |   |   |   |   |   |   |   |   |   |   |   |   |   |   |   |   |   |   |   |   |   |   |   |   |   |   |   |   |   |   |   |   |   |   |   |   |   |   |   |   |   |   |   |   |   |   |   |   |   |   |   |   |   |   |   |   |   |   |   |   |   |   |   |   |   |   |   |   |   |   |   |   |   |   |   |   |   |   |   |   |   |   |   |   |   |   |   |   |   |   |   |   |   |   |   |   |   |   |   |   |   |   |   |   |   |   |   |   |   |   |   |   |   |   |   |   |   |   |   |   |   |   |   |   |   |   |   |   |   |   |   |   |   |   |   |   |   |   |   |   |   |   |   |   |   |   |   |   |   |   |   |   |   |   |   |   |   |   |   |   |   |   |   |   |   |   |   |   |   |   |   |   |   |   |   |   |   |   |   |   |   |   |   |

Fig.S2

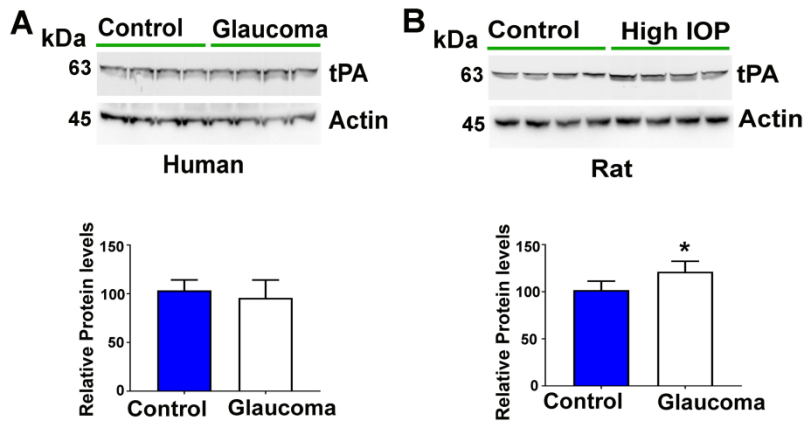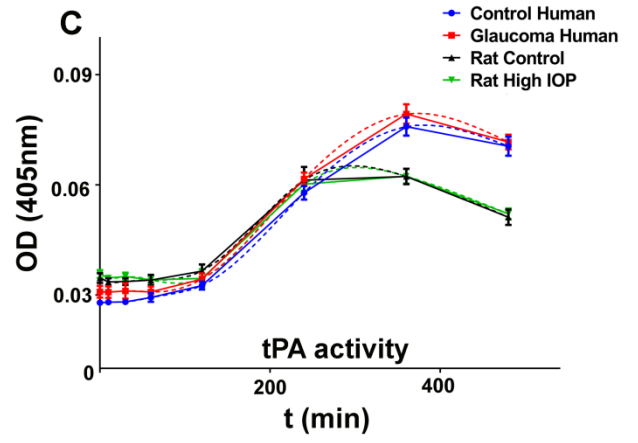

Fig S3

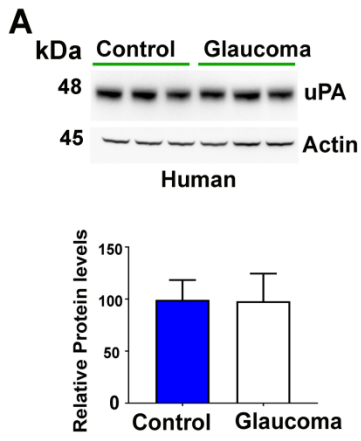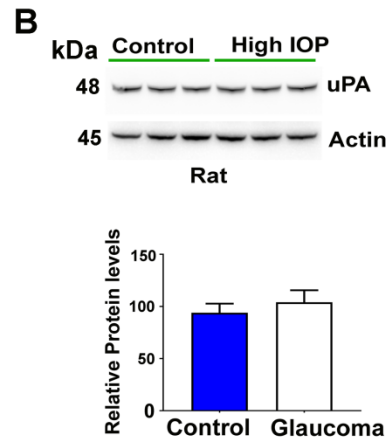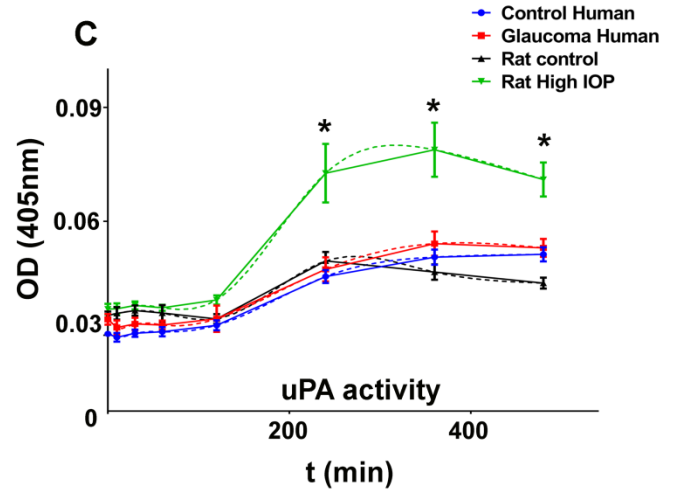

Fig S4

| <b>Plasminogen peptides</b> |                            |
|-----------------------------|----------------------------|
| 1                           | KVYLSECK                   |
| 2                           | WSSTSPHRPR                 |
| 3                           | FSPATHPSEGLEENYCR          |
| 4                           | ELRPWCFTTDPNK              |
| 5                           | RWELCDIPRCTTPPPSSGPTYQCLK  |
| 6                           | NLDENYCRNPDGK              |
| 7                           | TPENFPCK                   |
| 8                           | RAPWCHTTNSQVR              |
| 9                           | APWCHTTNSQVR               |
| 10                          | KCQSWSSMTPHR               |
| 11                          | CQSWSSMTPHR                |
| 12                          | TPENYPNAGLTMNYCR           |
| 13                          | HSIFTPETNPR                |
| 14                          | NPDGDVGGPWICYTTNPR         |
| 15                          | LSSPAVITDKVIPACLPSPNYVVADR |
| 16                          | VIPACLPSPNYVVADR           |
| 17                          | VCNRYEFLNGR                |
| 18                          | FVTWIEGVMR                 |

**Fig. S5**



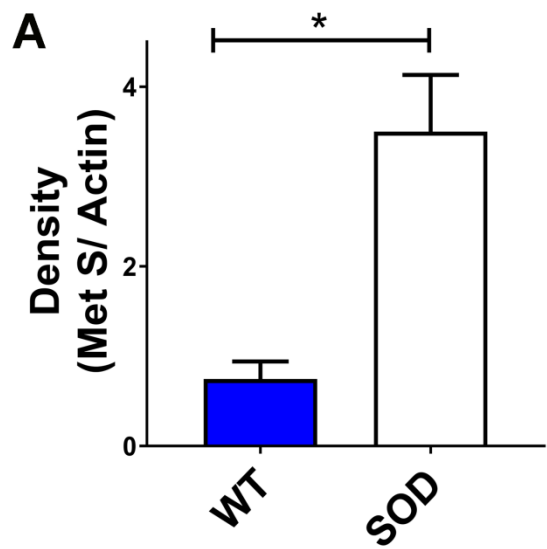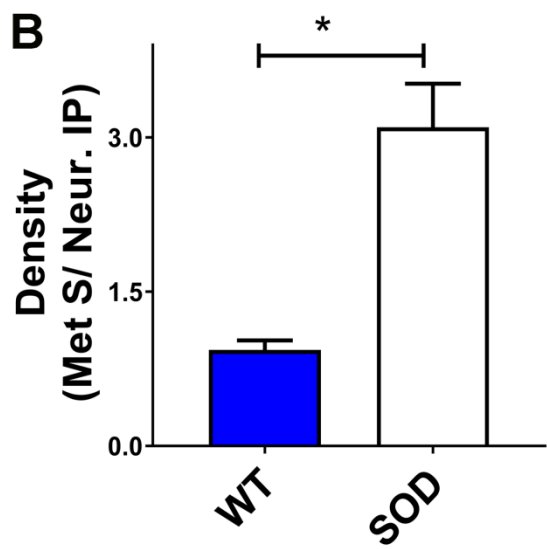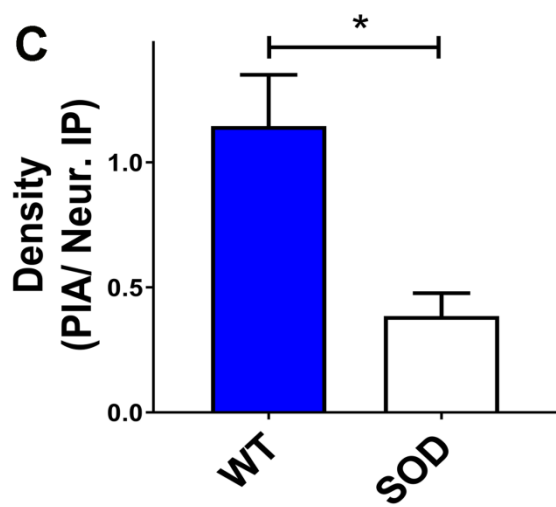

**Fig S6**
